# Supplementary material for: Genome-wide association analysis and accuracy of genome-enabled breeding value predictions for resistance to infectious hematopoietic necrosis virus in a commercial rainbow trout breeding population
Source: Genet Sel Evol. 2019 Aug 28;51:47. doi: 10.1186/s12711-019-0489-z (PMC6712688; doi:10.1186/s12711-019-0489-z)
Supplement: Supplementary file 5 — Additional file 5: Table S4. Summary of QTL for IHNV resistance reported in previous studies in rainbow trout populations. The data provided represent a summary of all reported QTL for IHNV resistance in past QTL/GWAS studies performed in rainbow trout populations. This table provides information on experimental variables including sample size, number of markers, disease phenotype, method of analysis, software, location of reported QTL on genetic and physical maps, and statistics such as nominal P value and LOD score for the reported QTL. [file 12711_2019_489_MOESM5_ESM.xlsx]

## Sheet: Table S4
Additional file 5 Table S4 Summary of QTL for IHNV resistance reported in previous studies in rainbow trout populations
Reference	Journal Name	Type of Marker	Number of markers	Number phenotyped fish	Number genotyped fish	IHNV resistance phenotype	Method of Analysis3	Software	Genetic linkage map (cM)					Physical map (bp)1			P-value	Log10(P)	LOD-score	Overlap with our QTL	NOTES	Start-Marker sequence	Gene
									LG	Start	End	Start-Marker	Near-Marker	Omy	Start	End							Name	Forwar primer	Backward primer
Barroso et al., 2004	Aquaculture	AFLP & STR	23 STR; 143 AFLP	246	235	STATUS	Multiple-locus HK regression	R/Qtl	RC-7; OA-XIII	102		accaca.93.ctt	OMM1139	20	29615418	29615827			3.3	No
Barroso et al., 2004	Aquaculture	AFLP & STR	23 STR; 143 AFLP	246	235	STATUS	Multiple-locus HK regression	R/Qtl	RC-2	20		aagact.175.ctt		N/A	N/A	N/A			2.9	?
Barroso et al., 2004	Aquaculture	AFLP & STR	23 STR; 143 AFLP	246	235	STATUS	Multiple-locus HK regression	R/Qtl	RC-10; OA-XIX	32		accatc.300.ctt		N/A	N/A	N/A			3.7	No
Barroso et al., 2004	Aquaculture	AFLP & STR	23 STR; 143 AFLP	246	235	STATUS	Multiple-locus HK regression	R/Qtl	RC-11; OA-XXX	14		agcacg.248.ctt	OMYRGT34; OMY1120	N/A	N/A	N/A			3.6	No
Campbell et al., 2014	G3	RAD	4661	153	384	STATUS	LMM; single-marker test	Tassel	WS03/Omy05			R19689		5	19194408		0.00329355	2.48234		No		ATCATCTGAGACCAGCCACCCAGACAGCTGTGGGTTTGTGGGTTTGCACAACCAAATA[A/T]
Campbell et al., 2014	G3	RAD	4661	153	384	STATUS	LMM; single-marker test	Tassel	WS03/Omy05			R04597		5	28599415		0.00406646	2.39078		No	It is 30 Mb far from suggestive QTL5.1	CTCATCCTGACATGACCCTGCAGCTTGACAATGTCACCAGCCATACT[G/A]CTCGTTCTGAG
Campbell et al., 2014	G3	RAD	4661	153	384	STATUS	LMM; single-marker test	Tassel	WS13/Omy06			R52674		6	17102817		0.0025441	2.59447		No		GGACCCACCAATCCTGAAGAAGTTAAAGACTCCAGCCATTCAAGC[C/A]ATAGACTGGCTGG
Campbell et al., 2014	G3	RAD	4661	153	384	STATUS	LMM; single-marker test	Tassel	WS13/Omy06			R14353		6	17176115		9.52083e-05	4.02133		No	We do not have any QTL on their most	AGTACATAACATGAC[C/T]GTACATATTTAATATGCTATTCAAGTGTTTTAAGACACCAATA
Campbell et al., 2014	G3	RAD	4661	153	384	STATUS	LMM; single-marker test	Tassel	WS13/Omy06			R03138		6	22119910		0.00101122	2.99515		No	promising region or CHR Omy6	TGCCCGGCCCGCCACAAGGAGTCGCTTGA[A/G]CGAGTAAAGTCCCCCTGGTTGTGATACAG
Campbell et al., 2014	G3	RAD	4661	153	384	STATUS	LMM; single-marker test	Tassel	WS13/Omy06			R14972		6	27336649		0.00418673	2.37812		No		CTACCACTCTTTCCCCAAGTAAGTA[T/C]CCGGGTGAATGGTTAAACAACTAGCCTAAACAG
Campbell et al., 2014	G3	RAD	4661	153	384	STATUS	LMM; single-marker test	Tassel	WS13/Omy06			R33079		6	27496336		0.00245779	2.60946		No		CCATGGGCAACCTCACCCCTCTCCATAC[C/G]CCTACTCCTCCACAGTCCCCTCAGAGCTCA
Campbell et al., 2014	G3	RAD	4661	153	384	STATUS	LMM; single-marker test	Tassel	WS13/Omy06			R21407		6	28342344		5.98222e-05	4.22314		No		GAGTGAGAATGGAGGACAAGAAGGTAGATG[G/C]GGTAAGGCCATGGCCAGTCCCAACCACC
Campbell et al., 2014	G3	RAD	4661	153	384	STATUS	LMM; single-marker test	Tassel	WS13/Omy06			R53350		6	30145290		0.00162972	2.78789		No		CCAAACTCTCCCCTAACCCGGACGACGCTGGGAAAATTGTA[C/T]GCCGCCCTATGGGTCTC
Campbell et al., 2014	G3	RAD	4661	153	384	STATUS	LMM; single-marker test	Tassel	WS13/Omy06			R24813		6	31806765		0.00089456	3.04839		No		TTTGACTCCTGATGAATGCCCCGTCTGCGGAATCTCTCTTGCTCGCTCTCTC[A/G]GCAATC
Campbell et al., 2014	G3	RAD	4661	153	384	STATUS	LMM; single-marker test	Tassel	WS14/Omy10			R05136		10	15487814		0.0048729	2.31221		No		ACGGG[A/T]ATCACAATAGGGAGGAGGATGTCTTCCCTGTAATGCACAGTGTTAAGATTGCC
Campbell et al., 2014	G3	RAD	4661	153	384	STATUS	LMM; single-marker test	Tassel	WS14/Omy10			R48860		11	14285222		0.00244236	2.61219		No		CGCTCGCCC[T/C]GCCACAAGGAGTCGTTAGAACGCGATGAGCCAAGTAAAGCCCCCCAAGG
Campbell et al., 2014	G3	RAD	4661	153	384	STATUS	LMM; single-marker test	Tassel	WS07/Omy11			R39227		11	58434145		0.00144959	2.83875		No		C[C/A]TCCAGCTGCCTGCCTCACAGGCCAAATATGCTATTTAGAAAATTGGGATATAAGAGA
Campbell et al., 2014	G3	RAD	4661	153	384	STATUS	LMM; single-marker test	Tassel	WS29/Omy13			R45284		13	22478951		0.00436925	2.35959		No		CTACTATTAAAGTATCACTGCTTTGGTGTGTAATTCCAAT[G/A]CCCCTTTATCTTTTAAGT
Campbell et al., 2014	G3	RAD	4661	153	384	STATUS	LMM; single-marker test	Tassel	NA			R52799		16	9034301		0.0051639	2.28702		No	It is 15 Mb far from suggestive QTL16.1	GCTACAGACAGAC[T/G]ATCACTCTATCATGGTAGGATGGATGGAGGGAGGGAGCACATCAC
Campbell et al., 2014	G3	RAD	4661	153	384	STATUS	LMM; single-marker test	Tassel	NA			R18850		18	60100825		0.00419233	2.37754		No		TCTGGTGTCAGAATGCGCA[C/A]GGAGCTCCTCAGTGGATTACTTCTGGTACAGAGAGACAC
Campbell et al., 2014	G3	RAD	4661	153	384	STATUS	LMM; single-marker test	Tassel	NA			R53135		25	49919413		0.000953481	3.02069		No	It is 34 Mb far from QTL25.1	CACATTGCCTGGTGGCGTTTATTAATGTTTACATACTGTACCGTTT[A/C]TTTTTTTTTAAA
Campbell et al., 2014	G3	RAD	4661	153	384	STATUS	LMM; single-marker test	Tassel	WS24/Omy25			R46528		25	77528178		0.00177682	2.75036		No		AGTGAGTCACTG[C/A]TTTGATGTTTGCAGAGCACGACAGAGTGTTGTGCAGGGTCATTGCA
Campbell et al., 2014	G3	RAD	4661	153	384	STATUS	LMM; single-marker test	Tassel	WS28/Omy26			R52586		26	30270577		0.00166117	2.77959		No		TAGACTGTAC[T/C]AAGAGCTGAATCACAACTCCTGTATGGATAACACCACACTGGTCAAGT
Khoo et al., 2004	Fish Pathology	STR	96	460	460	STATUS	chi-square; single-marker test	R package	LG-2	69.4		OmyRGT35TUF		17	48789105	48789284	0.011	1.95861		YES	it is ~3 Mb far from QTL17.1
Khoo et al., 2004	Fish Pathology	STR	96	460	460	STATUS	chi-square; single-marker test	R package	LG-2			OmyFGT3TUF		N/A	N/A	N/A	0.011	1.95861		?
Khoo et al., 2004	Fish Pathology	STR	96	460	460	STATUS	chi-square; single-marker test	R package	LG-2	81.7		OmyFGT25TUF		N/A	N/A	N/A	0.011	1.95861		?
Khoo et al., 2004	Fish Pathology	STR	96	460	460	STATUS	chi-square; single-marker test	R package	LG-2			BFRO0001		N/A	N/A	N/A	0.011	1.95861		?
Palti et al., 2001	Aquaculture	RFLP		1200	43	STATUS	chi-square; single-marker test		Omy17					17	49667182	49667361	0.024	1.61979		YES	It is ~2 Mb far from QTL17.1		MHC class II beta-chain	5'-TACAGCGCCATACTGGACAA-3'	5'-TGAGCTCAGTCTGACATGGG-3'
Rodriguez et al., 2004	Aquaculture	AFLP & STR	13	~2000	460	STATUS	chi-square; single-marker test		LG-20			OtsG3		6	11908270	11908403	0.042	1.37675		No
Rodriguez et al., 2004	Aquaculture	AFLP & STR	13	~2000	460	STATUS	chi-square; single-marker test		LG-25; OA-III			Ogo2		14	56229930	56229443	0.001	3		No	it is 36.4 Mb far from suggestive QTL14.1
Rodriguez et al., 2004	Aquaculture	AFLP & STR	13	~2000	460	STATUS	chi-square; single-marker test		LG-25; OA-III			Oneu8		14	71788792	71788933	0.027	1.56864		No	it is 52 Mb far from suggestive QTL14.1
Rodriguez et al., 2004	Aquaculture	AFLP & STR	13	~2000	460	STATUS	chi-square; single-marker test		LG-25; OA-III			OMM1054		25	11796070	11796615	0.0001	4		YES	it is 2.4 Mb far from QTL25.1, so it belongs to QTL25.1 region
Rodriguez et al., 2004	Aquaculture	AFLP & STR	13	~2000	460	STATUS	chi-square; single-marker test		LG-11; OA-X			Ssa7NVH		N/A	N/A	N/A	0.002	2.69897		?			59030557
Rodriguez et al., 2004	Aquaculture	AFLP & STR	13	~2000	460	STATUS	chi-square; single-marker test		LG-11; OA-X			OtsG78		N/A	N/A	N/A	0.042	1.37675		?			49667361
Rodriguez et al., 2004	Aquaculture	AFLP & STR	13	~2000	460	STATUS	chi-square; single-marker test		LG-20			FGT1		N/A	N/A	N/A	0.01	2		?			9363196
Rodriguez et al., 2004	Aquaculture	AFLP & STR	13	~2000	460	STATUS	chi-square; single-marker test		LG-20	51		Ssa94NVH		N/A	N/A	N/A	0.001	3		?
Footnotes:
References of previously reported QTL are group-colored
LMM = linear-mixed model
STATUS = binary survival STATUS
DAYS = discrete survival DAYS post-disease challenge
1Rainbow trout genome asembly from Palti et al., 2018
HK = Multiple-locus Haley-Knott regression
*Chromosome-wide significant QTL at P=0.05
**Experiment-wide significant QTL at P=0.05
***Experiment-wide significant QTL at P=0.01
